# Supplementary material
Source: Royal Society of Chemistry journal article supplement (doi:10.1039/d6tc01100d)
Supplement: d6tc01100d1.pdf [file d6tc01100d1.pdf]

**Harsh-environment-stable organic heterojunction memristor  
enabling reliable neuromorphic computing and hardware-aware  
neural network implementation**

*Jiayu Li<sup>1,2\*</sup>, Ziyi Feng<sup>2</sup>, Guojun Zhu<sup>1</sup>, Xiaoguang Hu<sup>1,2</sup>, Yangzhou Qian<sup>3\*</sup>, Wen Li<sup>2</sup>,  
Mingdong Yi<sup>2\*</sup>, Qiang Zhao<sup>1,2\*</sup>*

1. College of Electronic and Optical Engineering & College of Flexible Electronics (Future Technology), Jiangsu Province Engineering Research Center for Fabrication and Application of Special Optical Fiber Materials and Devices, Nanjing University of Posts and Telecommunications (NUPT), Nanjing 210023, China

2. State Key Laboratory of Flexible Electronics (LoFE), Institute of Advanced Materials (IAM), Nanjing University of Posts & Telecommunications (NUPT), Nanjing, China

3. School of Electronics Information Engineering & School of Integrated Circuits, Nanjing University of Industry Technology, Nanjing, 210023, China

\*Correspondence:

[jyli@njupt.edu.cn](mailto:jyli@njupt.edu.cn), [yzqian@niit.edu.cn](mailto:yzqian@niit.edu.cn), [iammdyi@njupt.edu.cn](mailto:iammdyi@njupt.edu.cn),

[iamqzhao@njupt.edu.cn](mailto:iamqzhao@njupt.edu.cn)

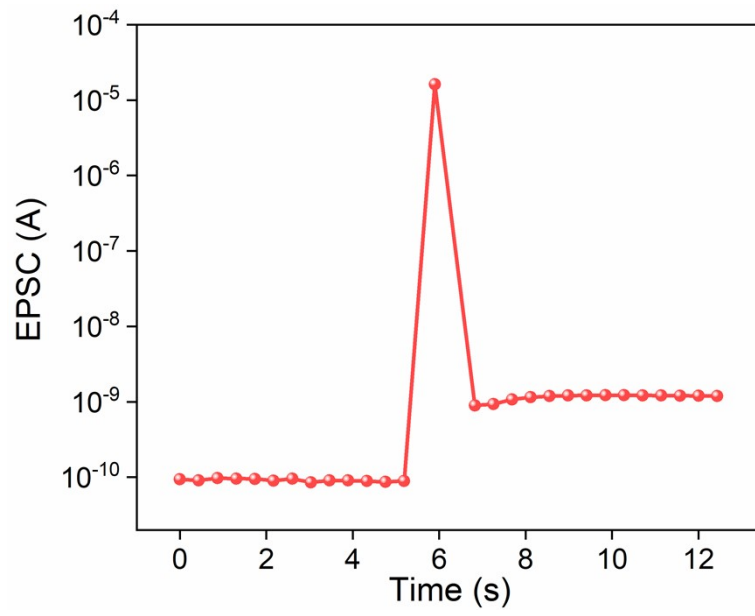

**Fig. S1** The  $F_{16}CuPc$  /MDMO-PPV organic heterojunction memristor simulates EPSC behavior.

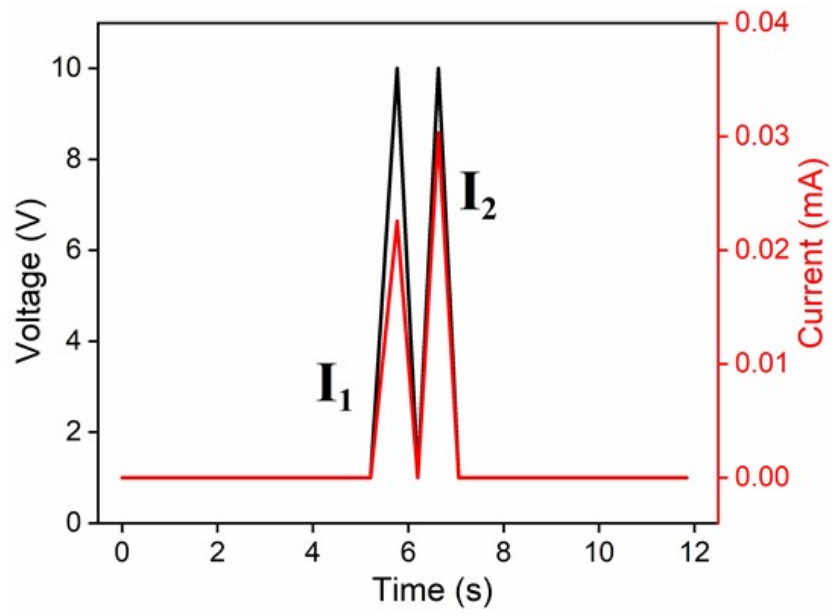

**Fig. S2** The  $F_{16}CuPc$  /MDMO-PPV organic heterojunction memristor simulates PPF behavior.

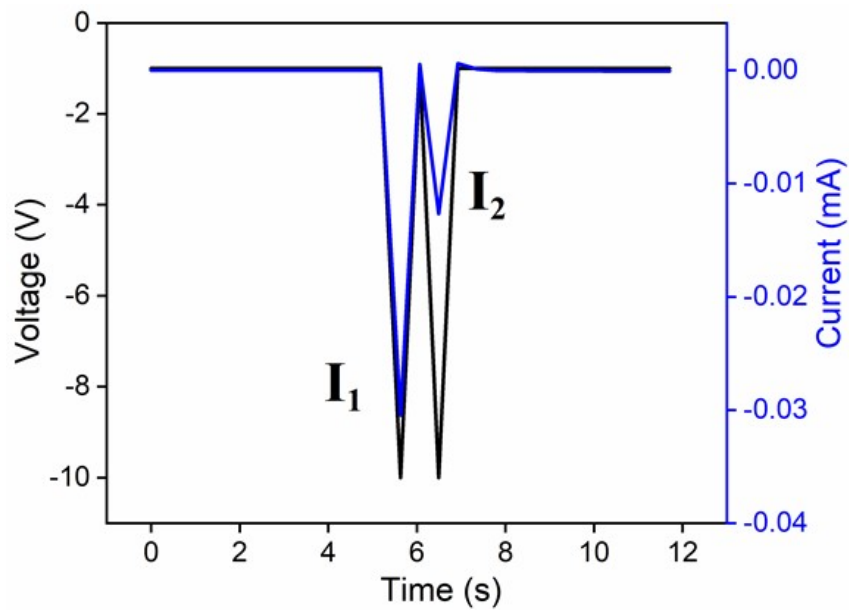

**Fig. S3** The  $F_{16}CuPc$  /MDMO-PPV organic heterojunction memristor simulates PPD behavior.

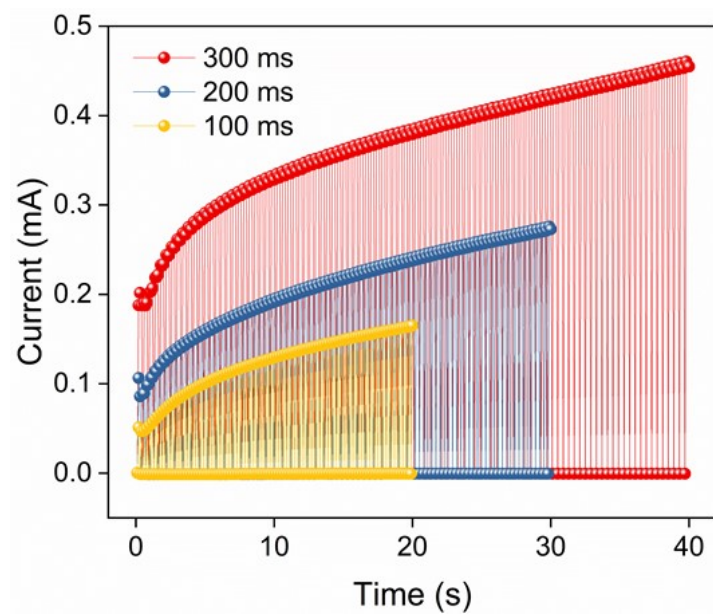

**Fig. S4** Current responses with different pulse widths (100, 200 and 300 ms).

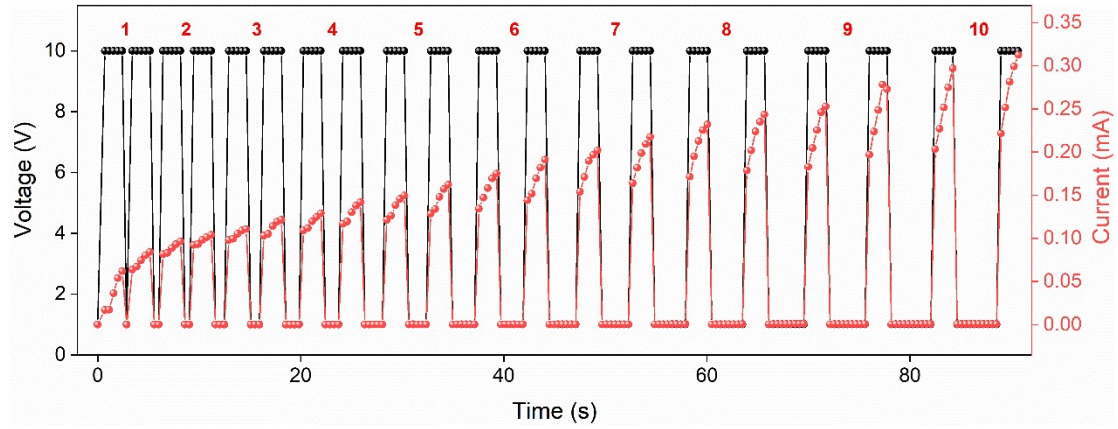

**Fig. S5** Current responses under pulse stimulation with simultaneously increased pulse width and interval at a fixed amplitude.

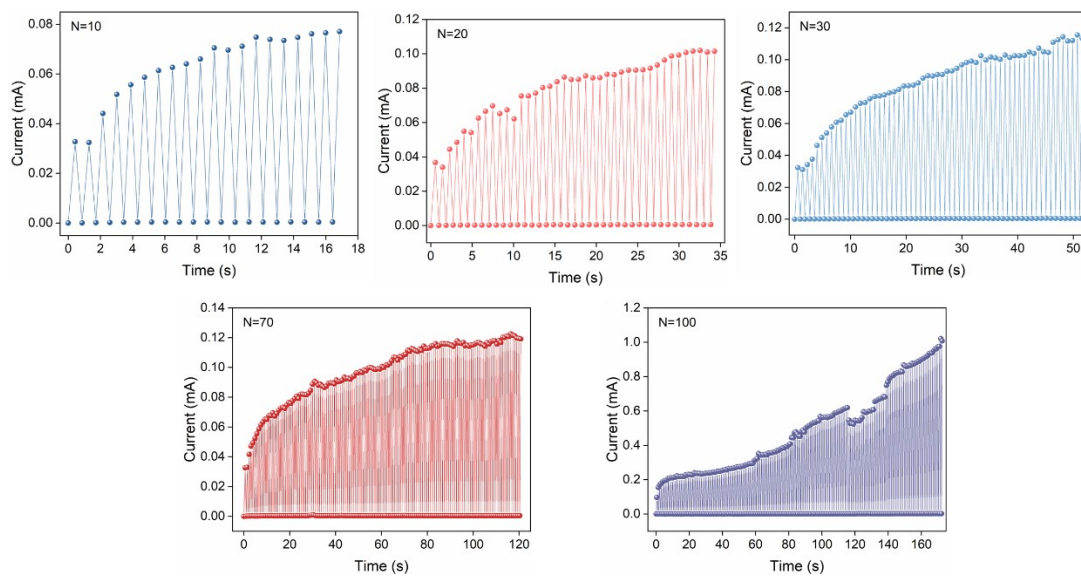

**Fig. S6** Current responses with different pulse numbers ( $N = 10, 20, 30, 70$  and  $100$ ).

25°C 70% RH

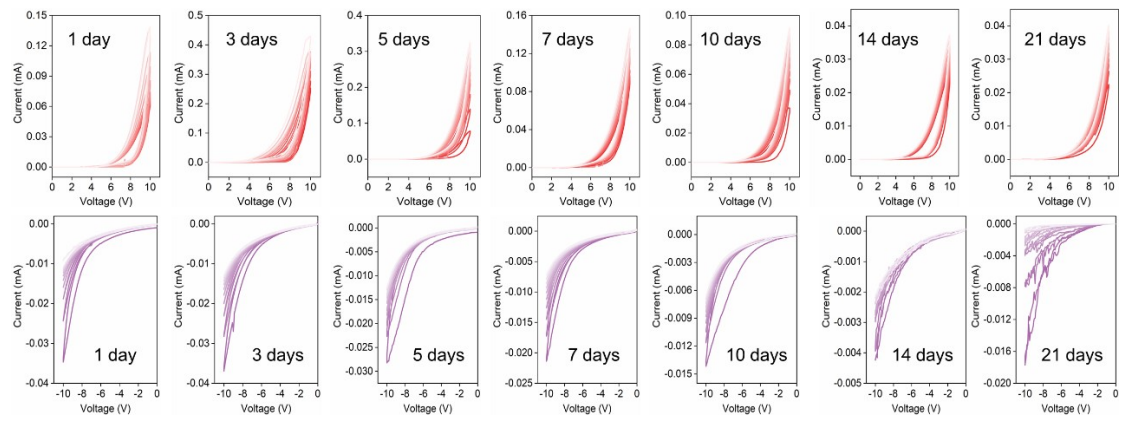

**Fig. S7**  $I-V$  characteristics of the  $F_{16}CuPc/MDMO-PPV$  heterojunction memristor measured after different storage durations under 25°C and 70% RH.

70% RH

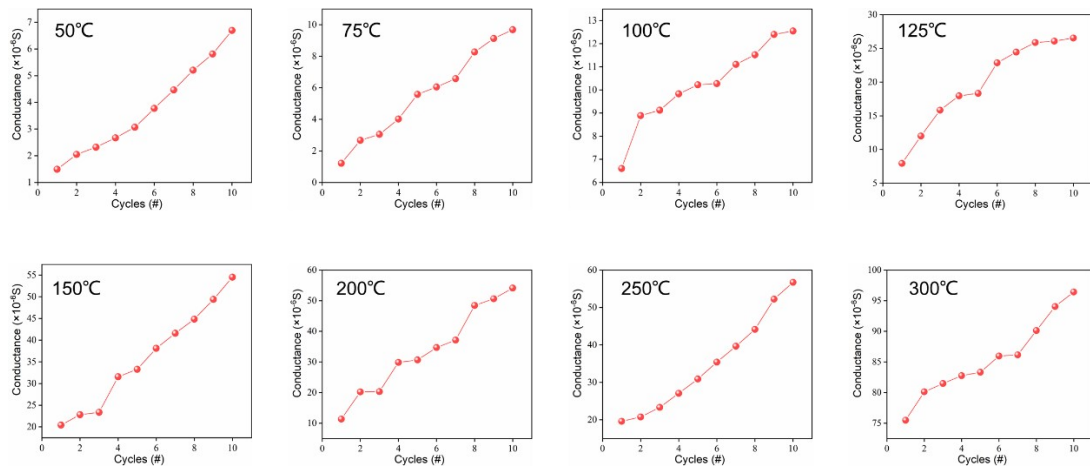

**Fig. S8** Conductance evolution under consecutive positive voltage sweeps at different temperatures (50–300°C) under 70% RH.

70% RH

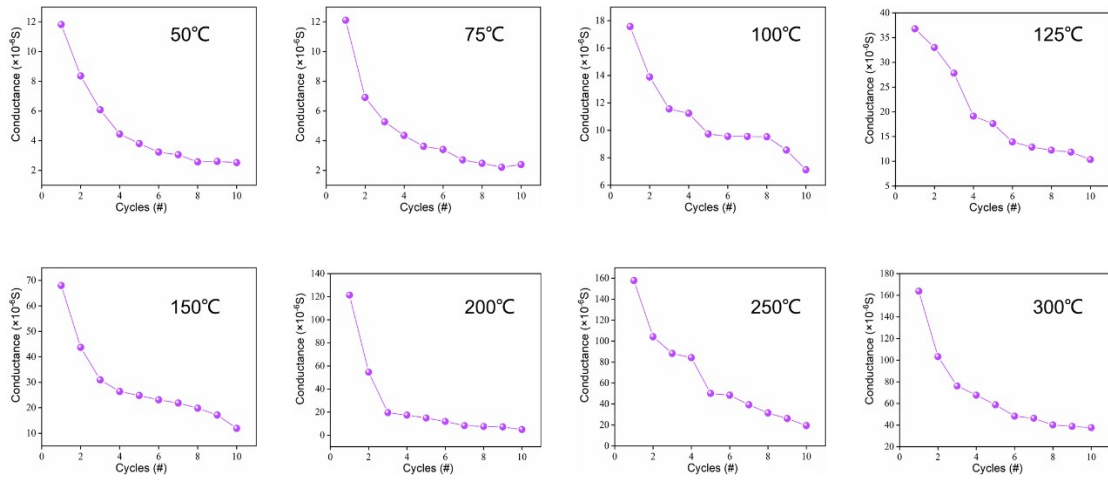

**Fig. S9** Conductance evolution under consecutive negative voltage sweeps at different temperatures (50–300°C) under 70% RH.

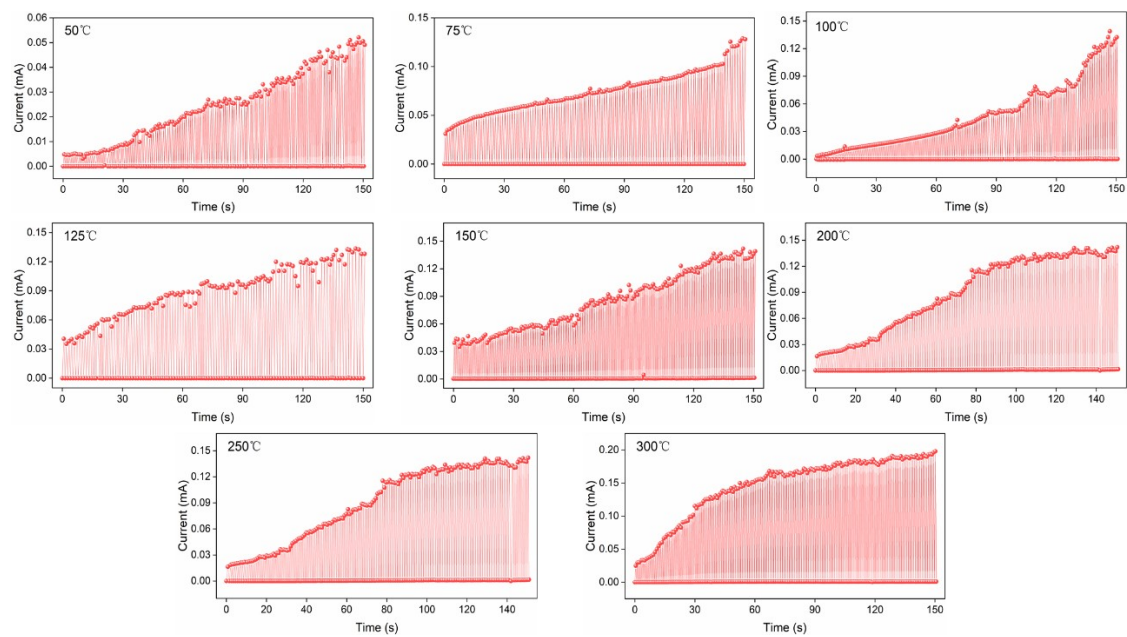

**Fig. S10** Current responses to consecutive positive voltage pulses ( $V_{\text{pos}} = 10$  V) at different temperatures (50–300°C) under 70% RH.

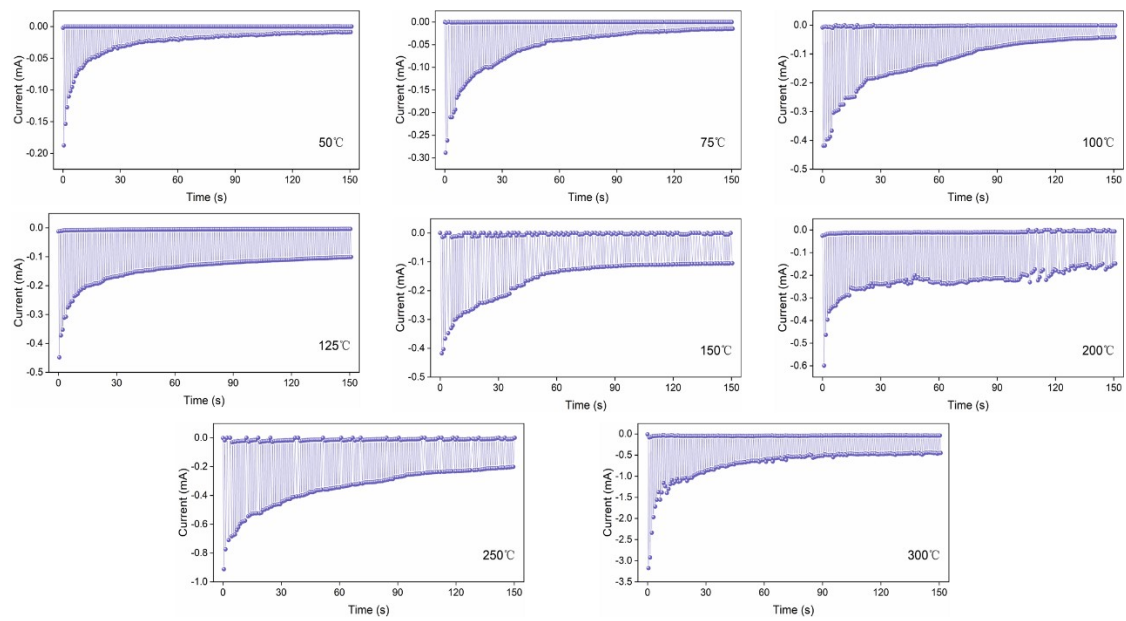

**Fig. S11** Current responses to consecutive negative voltage pulses ( $V_{\text{neg}} = -10$  V) at different temperatures (50–300°C) under 70% RH.

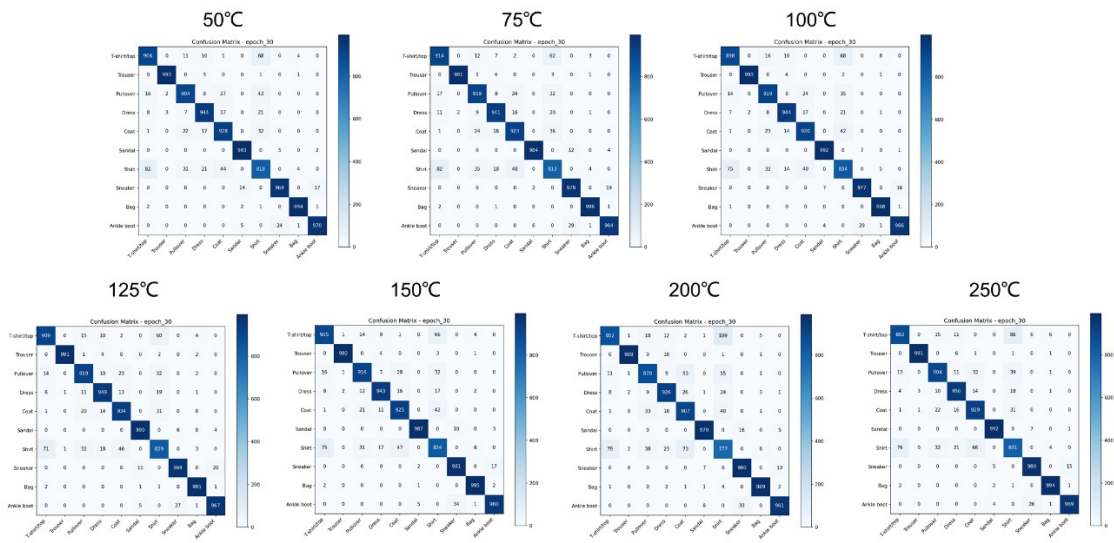

**Fig. S12** Confusion matrices under different temperatures (50, 75, 100, 125, 150, 200, and 250°C).

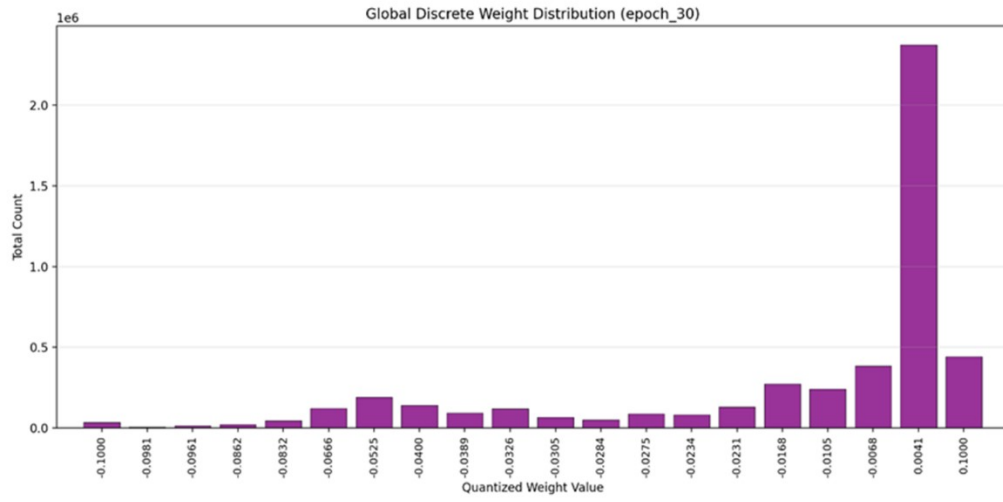

**Fig. S13** The global discrete weight distribution of the 300°C quantized model.

300°C

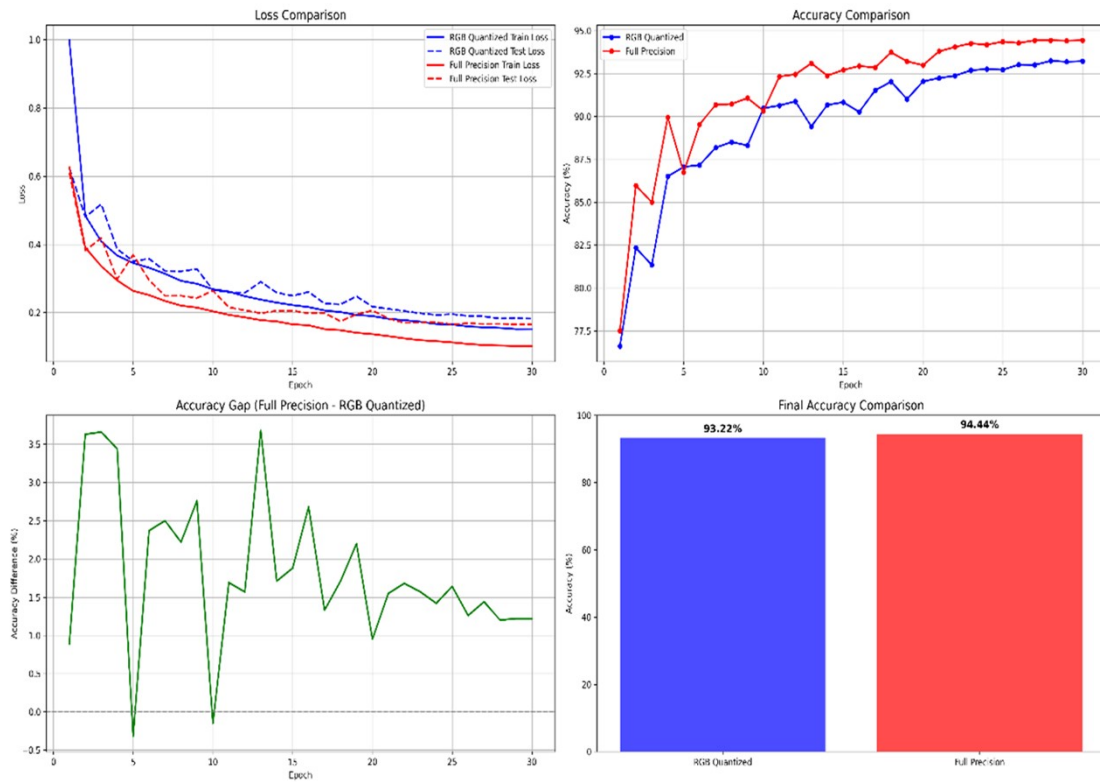

**Fig. S14** Training dynamics comparison between the quantized model constrained by 300°C device conductance states (blue) and the full-precision baseline (red) over 30 epochs.

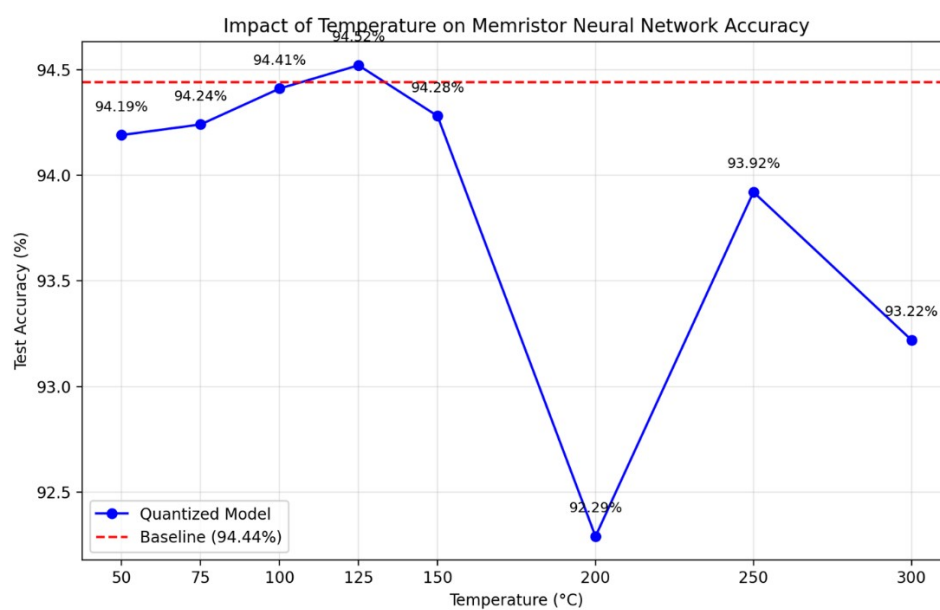

**Fig. S15** Inference accuracy of quantized models using device conductance states measured at different temperatures (50–300°C).

**Table. S1** Summary of  $I_1$ ,  $I_{10}$ , and  $I_{10}/I_1$  ratio extracted from consecutive  $I$ - $V$  sweeps of the  $F_{16}$ CuPc/MDMO-PPV memristor after different storage periods under 25°C and 70% RH.

| ITO/ $F_{16}$ CuPc/MDMO-PPV/Al<br><b>(25°C 70% RH)</b> | Time  |        |        |        |         |         |         |
|--------------------------------------------------------|-------|--------|--------|--------|---------|---------|---------|
|                                                        | 1 day | 3 days | 5 days | 7 days | 10 days | 14 days | 21 days |
| $I_1$ ( $\times 10^{-3}$ A)                            | 0.06  | 0.24   | 0.07   | 0.09   | 0.03    | 0.02    | 0.02    |
| $I_{10}$ ( $\times 10^{-3}$ A)                         | 0.14  | 0.41   | 0.31   | 0.14   | 0.09    | 0.04    | 0.04    |
| $I_{10}/I_1$                                           | 2.33  | 1.71   | 4.43   | 1.56   | 3.00    | 2.00    | 2.00    |

**Table. S2** Summary of  $G_1$ ,  $G_{10}$ , and  $G_{10}/G_1$  ratio of the F<sub>16</sub>CuPc/MDMO-PPV heterojunction device measured at different temperatures (50–300 °C) under 70% RH.

| ITO/ F <sub>16</sub> CuPc/MDMO-PPV/Al<br><b>(70% RH)</b> | Temperature (°C) |      |       |       |       |       |       |       |
|----------------------------------------------------------|------------------|------|-------|-------|-------|-------|-------|-------|
|                                                          | 50               | 75   | 100   | 125   | 150   | 200   | 250   | 300   |
| $G_1$ ( $\times 10^{-6}$ S)                              | 1.49             | 1.21 | 6.60  | 7.94  | 20.40 | 11.35 | 19.61 | 75.48 |
| $G_{10}$ ( $\times 10^{-6}$ S)                           | 6.70             | 9.68 | 12.54 | 26.54 | 54.52 | 54.11 | 56.71 | 96.42 |
| $G_{10}/G_1$                                             | 4.50             | 8.00 | 1.90  | 3.34  | 2.67  | 4.77  | 2.89  | 1.28  |
